# Supplementary material for: Causes of ischemic stroke in young adults versus non-young adults: A multicenter hospital-based observational study
Source: PubMed Central journal article supplement (PMC9278748; doi:10.1371/journal.pone.0268481), 2022-07-13

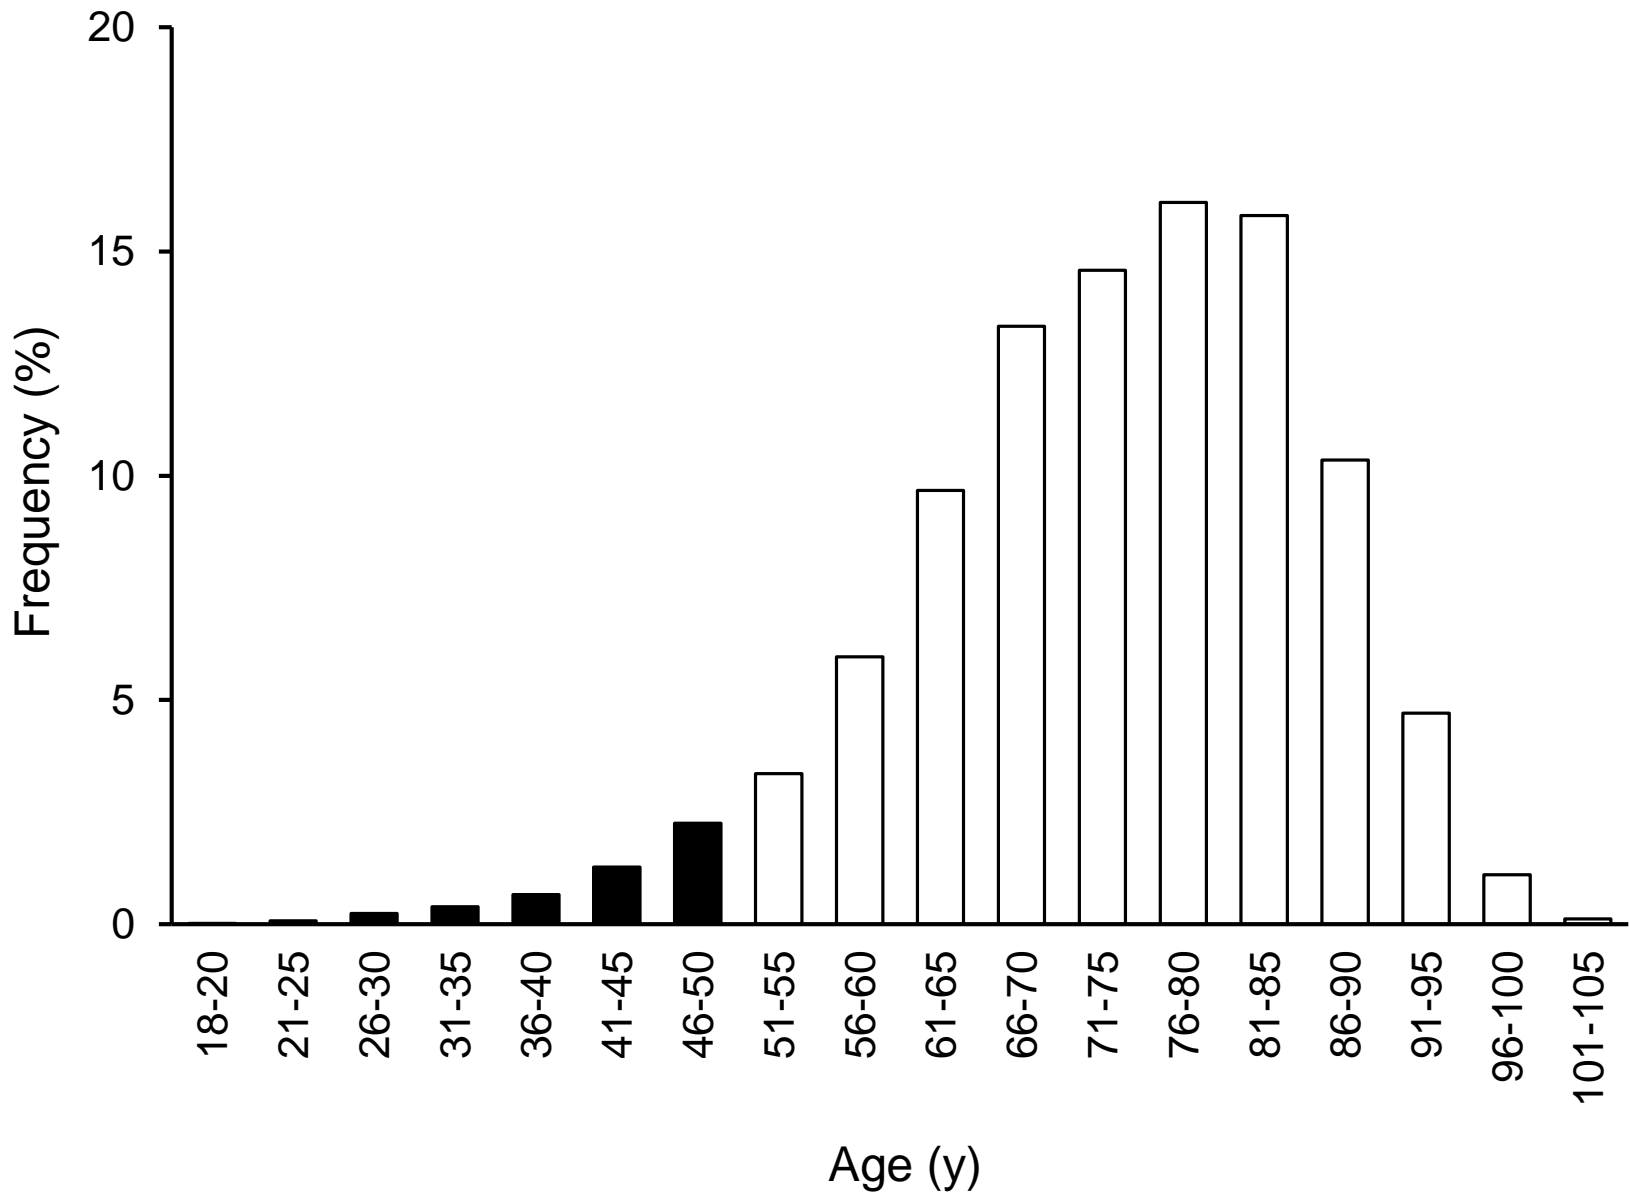

Supplement: pone.0268481.s003.pdf [file pone.0268481.s003.pdf]
