# Supplementary material for: Causes of ischemic stroke in young adults versus non-young adults: A multicenter hospital-based observational study
Source: PubMed Central journal article supplement (PMC9278748; doi:10.1371/journal.pone.0268481), 2022-07-13

Atrial fibrillation

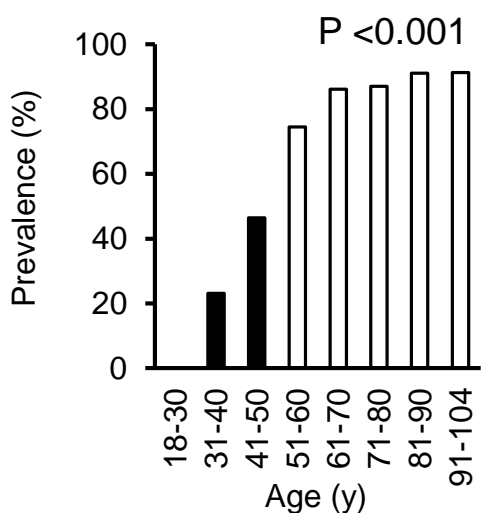

Dilated cardiomyopathy

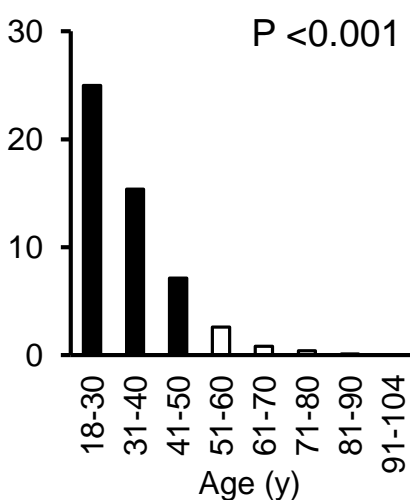

Intra-cardiac thrombus

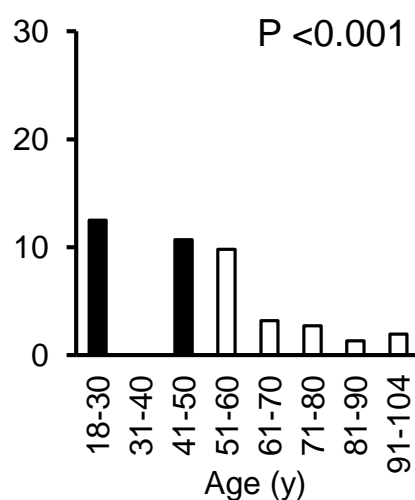

Atrial myxoma

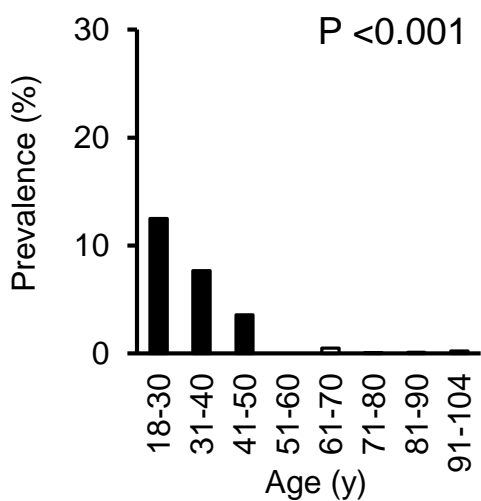

Left ventricular hypokinesis

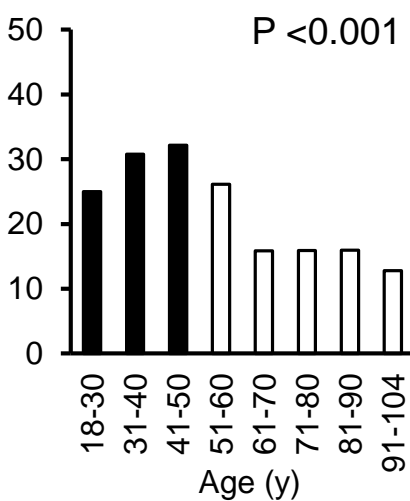

Patent foramen ovale

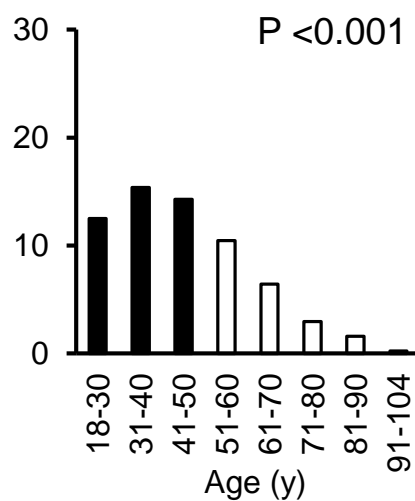

Nonbacterial thrombotic endocarditis

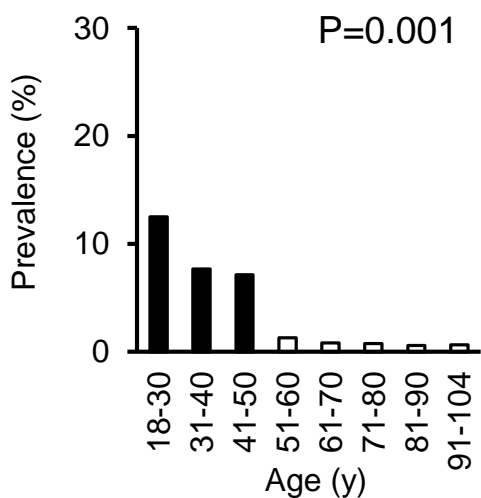

Congestive heart failure

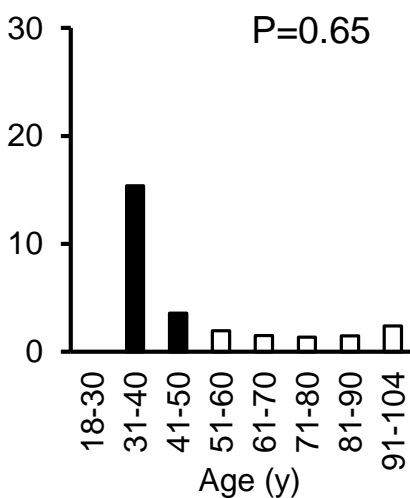

Atrial septal defect

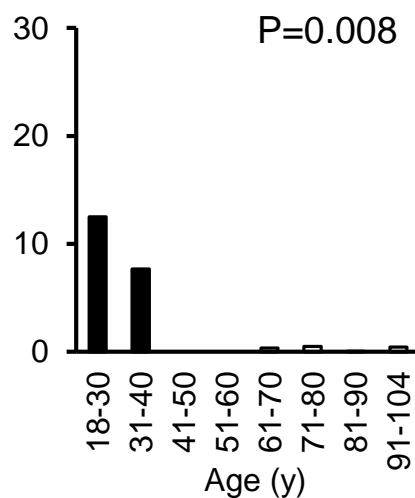

Supplement: pone.0268481.s004.pdf [file pone.0268481.s004.pdf]
