# Supplementary material for: Causes of ischemic stroke in young adults versus non-young adults: A multicenter hospital-based observational study
Source: PubMed Central journal article supplement (PMC9278748; doi:10.1371/journal.pone.0268481), 2022-07-13

Arterial dissection

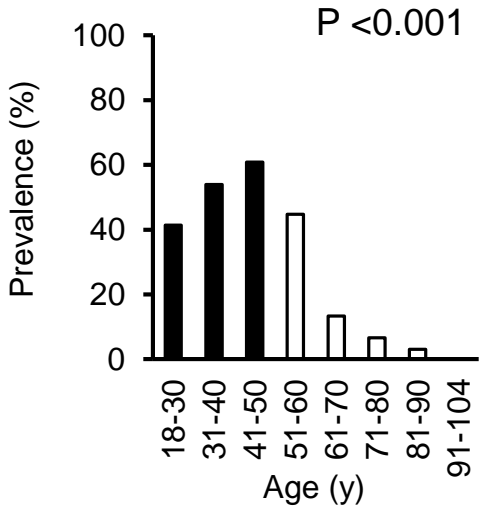

Moyamoya disease

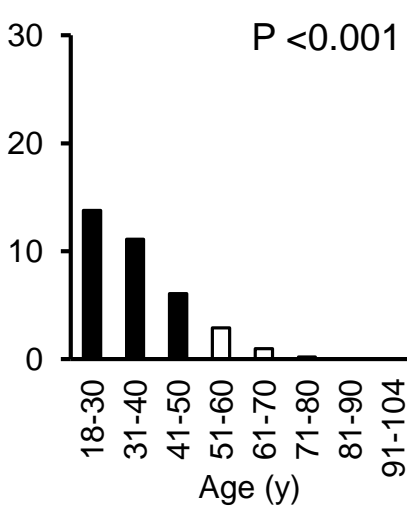

Aortic arch atherosclerotic plaques

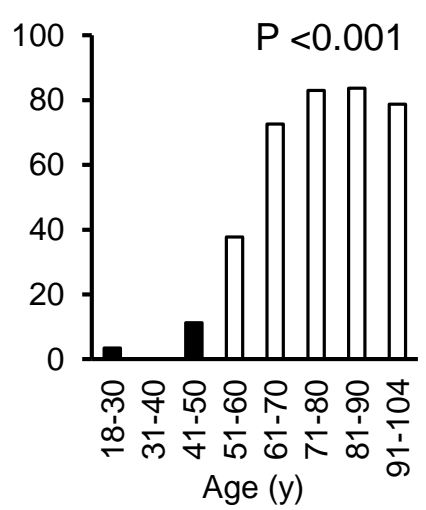

Cerebral venous thrombosis

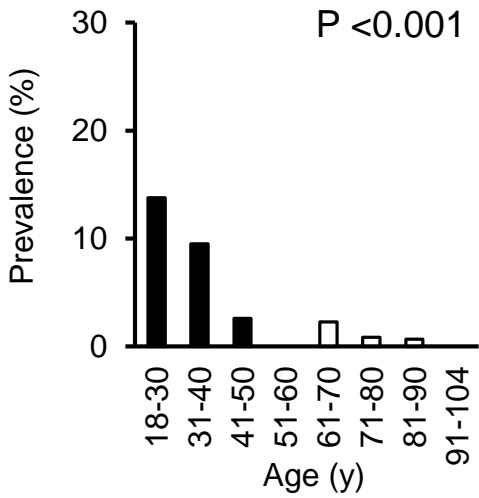

Reversible cerebral vasoconstriction syndrome

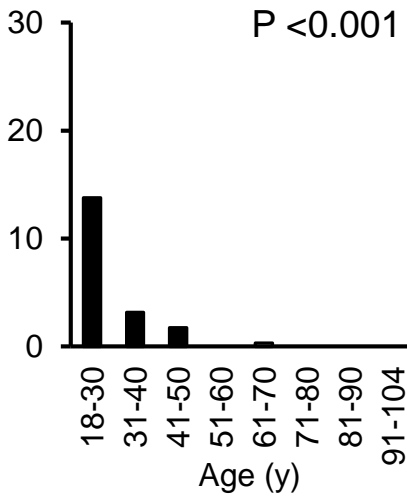

Other vascular causes

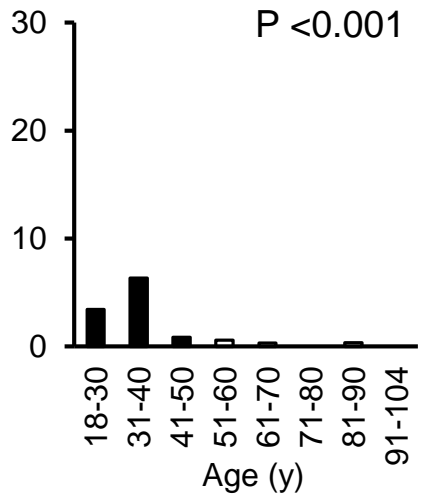

Antiphospholipid syndrome

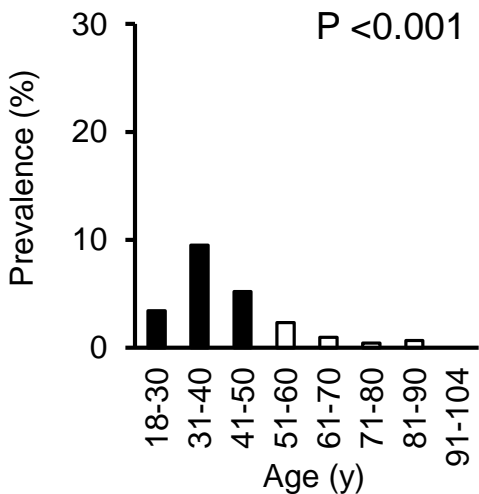

Protein S deficiency

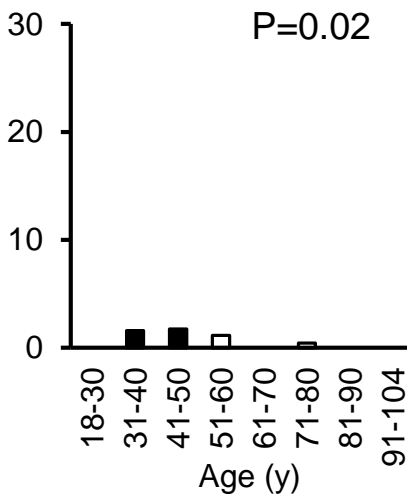

Supplement: pone.0268481.s005.pdf [file pone.0268481.s005.pdf]
