# Supplementary material for: Causes of ischemic stroke in young adults versus non-young adults: A multicenter hospital-based observational study
Source: PubMed Central journal article supplement (PMC9278748; doi:10.1371/journal.pone.0268481), 2022-07-13
Supplement: pone.0268481.s006.pdf [file pone.0268481.s006.pdf]

**S1 Table. Prevalence of vascular risk factors according to age among young adults.**

|                   | 18–30 y   | 31–35 y    | 36–40 y    | 41–45 y     | 46–50 y     | P <sub>trend</sub> |
|-------------------|-----------|------------|------------|-------------|-------------|--------------------|
| Hypertension      | 6 (11.3)* | 20 (32.3)* | 57 (54.3)* | 123 (60.9)* | 246 (68.9)* | <0.001             |
| Diabetes mellitus | 5 (9.4)*  | 6 (9.7)*   | 19 (18.1)* | 49 (24.3)   | 105 (29.4)  | <0.001             |
| Dyslipidemia      | 7 (13.2)* | 14 (22.6)* | 45 (42.9)  | 95 (47.0)   | 212 (59.4)  | <0.001             |
| Smoking           | 21 (39.6) | 38 (61.3)  | 69 (65.7)* | 129 (63.9)* | 243 (68.1)* | <0.001             |
| Drinking          | 15 (28.3) | 15 (24.2)  | 40 (38.1)  | 84 (41.6)*  | 173 (48.5)* | <0.001             |
| Obesity           | 14 (26.4) | 24 (38.7)  | 48 (45.7)* | 102 (51.5)* | 155 (43.5)* | 0.07               |

P<sub>trend</sub>: P for trend.

Data are expressed as n (%). P<sub>trend</sub> was tested for the proportion of risk factors according to 5-year age increments among young adults. \*P < 0.05 vs. non-young adults by multiple comparison.
