# Supplementary material for: Causes of ischemic stroke in young adults versus non-young adults: A multicenter hospital-based observational study
Source: PubMed Central journal article supplement (PMC9278748; doi:10.1371/journal.pone.0268481), 2022-07-13
Supplement: pone.0268481.s007.pdf [file pone.0268481.s007.pdf]

**S2 Table. Proportions of stroke subtypes according to age among young adults.**

|                              | 18–30 y   | 31–35 y   | 36–40 y   | 41–45 y   | 46–50 y    | P <sub>trend</sub> |
|------------------------------|-----------|-----------|-----------|-----------|------------|--------------------|
| Cardioembolism               | 8 (15.1)  | 4 (6.5)   | 9 (8.6)   | 8 (4.0)   | 20 (5.6)   | 0.02               |
| High-risk sources            | 5 (9.4)   | 1 (1.6)   | 4 (3.8)   | 6 (3.0)   | 15 (4.2)   | 0.48               |
| Medium-risk sources          | 3 (5.7)   | 3 (4.8)   | 5 (4.8)   | 2 (1.0)   | 5 (1.4)    | 0.01               |
| Large-artery atherosclerosis | 0 (0.0)   | 2 (3.2)   | 8 (7.6)   | 23 (11.4) | 49 (13.7)  | <0.001             |
| Small-vessel occlusion       | 2 (3.8)   | 11 (17.7) | 28 (26.7) | 61 (30.2) | 138 (38.7) | <0.001             |
| Other determined etiology    | 29 (54.7) | 28 (45.2) | 35 (33.3) | 51 (25.3) | 64 (17.9)  | <0.001             |
| Arterial dissection          | 12 (22.6) | 14 (22.6) | 20 (19.1) | 32 (15.8) | 38 (10.6)  | <0.001             |
| Undetermined cause           | 14 (26.4) | 17 (27.4) | 25 (23.8) | 59 (29.2) | 86 (24.1)  | 0.64               |

P<sub>trend</sub>: P for trend.

Data are expressed as n (%). P<sub>trend</sub> was tested for the proportions of stroke subtypes according to 5-year age increments among young adults.
