# Supplementary material for: Causes of ischemic stroke in young adults versus non-young adults: A multicenter hospital-based observational study
Source: PubMed Central journal article supplement (PMC9278748; doi:10.1371/journal.pone.0268481), 2022-07-13
Supplement: pone.0268481.s008.pdf [file pone.0268481.s008.pdf]

**S3 Table. Embolic sources of ischemic stroke due to cardioembolism in young adults and non-young adults.**

|                                             | Young adults, n = 49 | Non-young adults, n = 3883 | OR (95% CI)         | P      | P <sub>trend</sub> |
|---------------------------------------------|----------------------|----------------------------|---------------------|--------|--------------------|
| <b>High-risk embolic sources</b>            |                      |                            |                     |        |                    |
| Atrial fibrillation                         | 16 (32.7)            | 3435 (88.5)                | 0.06 (0.03–0.12)    | <0.001 | <0.001             |
| Atrial fibrillation without mitral stenosis | 16 (32.7)            | 3384 (87.2)                | 0.07 (0.04–0.13)    | <0.001 | <0.001             |
| Atrial fibrillation with mitral stenosis    | 0 (0.0)              | 51 (1.3)                   | –                   | 1.00   | 0.95               |
| Dilated cardiomyopathy                      | 6 (12.2)             | 16 (0.4)                   | 33.72 (12.59–90.33) | <0.001 | <0.001             |
| Intracardiac thrombus                       | 4 (8.2)              | 95 (2.5)                   | 3.54 (1.25–10.05)   | 0.02   | <0.001             |
| Atrial myxoma                               | 3 (6.1)              | 7 (0.2)                    | 36.11 (9.05–144.03) | <0.001 | <0.001             |
| Left ventricular akinesia                   | 3 (6.1)              | 133 (3.4)                  | 1.84 (0.56–5.99)    | 0.31   | 0.006              |
| Sick sinus syndrome                         | 3 (6.1)              | 211 (5.4)                  | 1.13 (0.35–3.68)    | 0.83   | <0.001             |
| Mechanical prosthetic valve                 | 2 (4.1)              | 44 (1.1)                   | 3.71 (0.87–15.76)   | 0.08   | <0.001             |
| Infective endocarditis                      | 1 (2.0)              | 19 (0.5)                   | 4.24 (0.56–32.29)   | 0.16   | 0.04               |
| Recent myocardial infarction                | 0 (0.0)              | 13 (0.3)                   | –                   | 1.00   | 0.03               |
| <b>Medium-risk embolic sources</b>          |                      |                            |                     |        |                    |
| Left ventricular hypokinesia                | 15 (30.6)            | 619 (15.9)                 | 2.33 (1.26–4.30)    | 0.007  | <0.001             |
| Patent foramen ovale                        | 7 (14.3)             | 114 (2.9)                  | 5.51 (2.42–12.53)   | <0.001 | <0.001             |
| Nonbacterial thrombotic endocarditis        | 4 (8.2)              | 29 (0.8)                   | 11.81 (3.99–34.99)  | <0.001 | 0.001              |
| Congestive heart failure                    | 3 (6.1)              | 61 (1.6)                   | 4.09 (1.24–13.50)   | 0.02   | 0.65               |
| Left atrial turbulence                      | 3 (6.1)              | 262 (6.8)                  | 0.90 (0.28–2.92)    | 0.86   | <0.001             |
| Atrial septal defect                        | 2 (4.1)              | 11 (0.3)                   | 14.98 (3.23–69.44)  | 0.001  | 0.008              |
| Bioprosthetic cardiac valve                 | 1 (2.0)              | 34 (0.9)                   | 2.36 (0.32–17.58)   | 0.40   | 0.88               |
| Atrial septal aneurysm                      | 1 (2.0)              | 35 (0.9)                   | 2.29 (0.31–17.06)   | 0.42   | 0.002              |
| Old myocardial infarction                   | 0 (0.0)              | 1 (0.0)                    | –                   | 1.00   | 0.55               |
| Mitral stenosis without atrial fibrillation | 0 (0.0)              | 8 (0.2)                    | –                   | 1.00   | 0.93               |
| Mitral valve prolapse                       | 0 (0.0)              | 43 (1.1)                   | –                   | 1.00   | 0.20               |
| Mitral annulus calcification                | 0 (0.0)              | 43 (1.1)                   | –                   | 1.00   | <0.001             |
| Atrial flutter                              | 0 (0.0)              | 73 (1.9)                   | –                   | 1.00   | 0.16               |

OR: odds ratio, CI: confidence interval, P<sub>trend</sub>: P for trend.

Data are presented as n (%). OR and 95% CI of each embolic source in young adults were estimated in reference to non-young adults. When patients had multiple embolic sources, all potential sources were listed. P<sub>trend</sub> was tested according to 10-year age increments in all patients.
