# Supplementary material for: Causes of ischemic stroke in young adults versus non-young adults: A multicenter hospital-based observational study
Source: PubMed Central journal article supplement (PMC9278748; doi:10.1371/journal.pone.0268481), 2022-07-13
Supplement: pone.0268481.s009.pdf [file pone.0268481.s009.pdf]

**S4 Table. Uncommon causes of ischemic stroke due to other determined etiologies in young adults and non-young adults.**

|                                               | Young adults, n = 207 | Non-young adults, n = 1278 | OR (95% CI)         | P      | P <sub>trend</sub> |
|-----------------------------------------------|-----------------------|----------------------------|---------------------|--------|--------------------|
| <b>Vascular origin</b>                        |                       |                            |                     |        |                    |
| Arterial dissection                           | 116 (56.0)            | 158 (12.4)                 | 9.04 (6.55–12.46)   | <0.001 | <0.001             |
| Moyamoya disease                              | 18 (8.7)              | 9 (0.7)                    | 13.43 (5.95–30.33)  | <0.001 | <0.001             |
| Aortic arch atherosclerotic plaques           | 14 (6.8)              | 951 (74.4)                 | 0.02 (0.01–0.04)    | <0.001 | <0.001             |
| Cerebral venous thrombosis                    | 13 (6.3)              | 13 (1.0)                   | 6.52 (2.98–14.27)   | <0.001 | <0.001             |
| Reversible cerebral vasoconstriction syndrome | 8 (3.9)               | 1 (0.1)                    | 51.34 (6.39–412.66) | <0.001 | <0.001             |
| Other vascular causes                         | 6 (2.9)               | 3 (0.2)                    | 12.69 (3.15–51.13)  | <0.001 | <0.001             |
| Angiitis                                      | 3 (1.5)               | 17 (1.3)                   | 1.09 (0.32–3.76)    | 0.89   | 0.87               |
| Arteriogenic embolism                         | 2 (1.0)               | 12 (0.9)                   | 1.03 (0.23–4.63)    | 0.97   | 0.90               |
| Aortic dissection                             | 0 (0.0)               | 7 (0.6)                    | –                   | 0.60   | 0.48               |
| <b>Hematologic origin</b>                     |                       |                            |                     |        |                    |
| Antiphospholipid syndrome                     | 13 (6.3)              | 11 (0.9)                   | 7.72 (3.41–17.47)   | <0.001 | <0.001             |
| Protein S deficiency                          | 3 (1.5)               | 4 (0.3)                    | 4.68 (1.04–21.08)   | 0.04   | 0.02               |
| Hypereosinophilic syndrome                    | 1 (0.5)               | 5 (0.4)                    | 1.24 (0.14–10.63)   | 0.85   | 0.96               |
| Other coagulopathies                          | 1 (0.5)               | 5 (0.4)                    | 1.24 (0.14–10.63)   | 0.85   | 0.56               |
| Protein C deficiency                          | 1 (0.5)               | 5 (0.4)                    | 1.24 (0.14–10.63)   | 0.85   | 0.20               |
| Anemia                                        | 1 (0.5)               | 7 (0.6)                    | 0.88 (0.11–7.20)    | 0.91   | 0.92               |
| Polycythemia                                  | 0 (0.0)               | 9 (0.7)                    | –                   | 0.62   | 0.70               |
| Essential thrombocythemia                     | 0 (0.0)               | 12 (0.9)                   | –                   | 0.39   | 0.03               |
| <b>Other causes</b>                           |                       |                            |                     |        |                    |
| Hyperhomocysteinemia                          | 4 (1.9)               | 9 (0.7)                    | 2.78 (0.85–9.11)    | 0.09   | 0.006              |
| Drugs                                         | 4 (1.9)               | 9 (0.7)                    | 2.78 (0.85–9.11)    | 0.09   | 0.72               |
| Pulmonary arteriovenous fistula               | 3 (1.5)               | 32 (2.5)                   | 0.57 (0.17–1.89)    | 0.36   | 0.003              |
| Miscellaneous causes                          | 1 (0.5)               | 3 (0.2)                    | 2.06 (0.21–19.93)   | 0.53   | 0.27               |
| Post-catheter                                 | 1 (0.5)               | 27 (2.1)                   | 0.22 (0.03–1.66)    | 0.14   | 0.005              |

OR: odds ratio, CI: confidence interval, P<sub>trend</sub>: P for trend.

Data are presented as n (%). OR and 95% CI of each uncommon cause in young adults were estimated in reference to non-young adults. When patients had multiple uncommon causes, all potential causes were listed. P<sub>trend</sub> was tested according to 10-year age increments in all patients.
