# Supplementary material for: Causes of ischemic stroke in young adults versus non-young adults: A multicenter hospital-based observational study
Source: PubMed Central journal article supplement (PMC9278748; doi:10.1371/journal.pone.0268481), 2022-07-13
Supplement: pone.0268481.s010.pdf [file pone.0268481.s010.pdf]

**S5 Table. Sex differences in embolic sources or uncommon causes in young adults.**

|                                     | Men       | Women     | P      |
|-------------------------------------|-----------|-----------|--------|
| Embolic sources                     | n = 49    | n = 13    |        |
| Atrial fibrillation                 | 14 (38.9) | 2 (15.4)  | 0.17   |
| Left ventricular hypokinesia        | 13 (36.1) | 2 (15.4)  | 0.29   |
| Uncommon causes                     | n = 120   | n = 87    |        |
| Arterial dissection                 | 83 (69.2) | 33 (37.9) | <0.001 |
| Moyamoya disease                    | 6 (5.0)   | 12 (13.8) | 0.03   |
| Aortic arch atherosclerotic plaques | 11 (9.2)  | 3 (3.5)   | 0.11   |
| Cerebral venous thrombosis          | 5 (4.2)   | 8 (9.2)   | 0.14   |
| Antiphospholipid syndrome           | 4 (3.3)   | 9 (10.3)  | 0.04   |

Data are presented as n (%). When patients with cardioembolism or other determined etiologies had multiple causes, all potential causes were listed. The frequencies of embolic sources or uncommon causes were compared between sexes in young adult patients. A comparison was performed for embolic sources and uncommon causes found in more than 10 young adult patients.
