# Supplementary material for: Causes of ischemic stroke in young adults versus non-young adults: A multicenter hospital-based observational study
Source: PubMed Central journal article supplement (PMC9278748; doi:10.1371/journal.pone.0268481), 2022-07-13
Supplement: pone.0268481.s011.pdf [file pone.0268481.s011.pdf]

**S6 Table. Literature review of stroke in young adults.**

|                               | Country           | Study period | N    | Age, y |
|-------------------------------|-------------------|--------------|------|--------|
| Varona et al. [10]            | Spain             | 1974–2002    | 272  | 15–45  |
| Rutten-Jacobs et al. [16]     | Netherlands       | 1980–2010    | 447  | 18–50  |
| Yesilot Barlas et al. [18]    | Europe            | 1988–2010    | 3331 | 15–49  |
| Jovanovic et al. [11]         | Serbia            | 1989–2005    | 865  | 15–45  |
| Rasura et al. [9]             | Italy             | 1992–2001    | 394  | 14–47  |
| Chan et al. [4]               | Canada            | 1993–1997    | 356  | 15–45  |
| Kwon et al. [5]               | Korea             | 1994–1997    | 149  | 15–44  |
| Cerrato et al. [7]            | Italy             | 1994–2001    | 273  | 16–49  |
| Putaalaa et al. [12]          | Finland           | 1994–2007    | 1008 | 15–49  |
| Lee et al. [6]                | Taiwan            | 1997–2001    | 241  | 18–45  |
| Nedeltchev et al. [8]         | Switzerland       | 1997–2002    | 203  | 16–45  |
| Spengos et al. [13]           | Greece            | 1999–2008    | 253  | 14–45  |
| Tancredi et al. [17]          | Italy             | 2000–2005    | 324  | 16–44  |
| Zhang et al. [14]             | China             | 2001–2010    | 669  | 18–45  |
| Ji et al. [15]                | China             | 2005–2010    | 215  | 18–45  |
| Renna et al. [20]             | Italy             | 2005–2013    | 150  | <50    |
| Jaffre et al. [19]            | France            | 2006–2012    | 400  | 16–54  |
| Nakagawa et al. [24]          | United States     | 2006–2012    | 427  | ≤55    |
| Tang et al. [29]              | China             | 2007–2018    | 411  | 18–50  |
| Goeggel Simonetti et al. [21] | Switzerland       | 2008–2012    | 624  | 16–55  |
| Li et al. [23]                | China             | 2008–2014    | 1395 | 18–45  |
| Fromm et al. [22]             | Norway            | 2010–2012    | 150  | 15–60  |
| Shaban et al. [28]            | United States     | 2010–2016    | 322  | 15–45  |
| Huang et al. [26]             | China             | 2012–2015    | 961  | 15–45  |
| Crespo Pimentel et al. [25]   | Portugal, Austria | 2014–2016    | 265  | 18–55  |
| Kono et al. [27]              | Japan             | 2015–2018    | 519  | 16–55  |
| Our study                     | Japan             | 2007–2019    | 779  | 18–50  |
