# Supplementary material for: Causes of ischemic stroke in young adults versus non-young adults: A multicenter hospital-based observational study
Source: PubMed Central journal article supplement (PMC9278748; doi:10.1371/journal.pone.0268481), 2022-07-13
Supplement: pone.0268481.s012.pdf [file pone.0268481.s012.pdf]

**S7 Table. Summary of a literature review for clinical features of stroke in young adults.**

|                                               | Min-Max | Median (IQR) | Ours |
|-----------------------------------------------|---------|--------------|------|
| <b>Risk factors</b>                           |         |              |      |
| Hypertension                                  | 19–64   | 37 (25–43)   | 58   |
| Diabetes mellitus                             | 2–33    | 9 (8–15)     | 24   |
| Dyslipidemia                                  | 8–60    | 37 (17–47)   | 48   |
| Atrial fibrillation                           | 0.5–29  | 3 (1–4)      | 3    |
| Smoking                                       | 29–59   | 47 (41–50)   | 64   |
| <b>Stroke subtype</b>                         |         |              |      |
| Cardioembolism                                | 6–47    | 19 (14–24)   | 6    |
| Large-artery atherosclerosis                  | 2–43    | 12 (8–17)    | 11   |
| Likely large-artery atherosclerosis           |         |              |      |
| Small-vessel occlusion                        | 3–42    | 13 (8–18)    | 31   |
| Other determined cause                        | 6–35    | 24 (17–28)   | 26   |
| Undetermined cause                            | 10–50   | 29 (24–36)   | 27   |
| <b>Embolic sources</b>                        |         |              |      |
| Patent foramen ovale                          | 3–45    | 12 (4–17)    | 8    |
| Dilated cardiomyopathy                        | 0.3–5   | 2 (1–3)      | 1    |
| Atrial septal defect                          | 0.3–1   | 1 (1–1)      | 1    |
| Atrial myxoma                                 | 0.1–1   | 0.4 (0.2–1)  | 0.4  |
| <b>Uncommon causes</b>                        |         |              |      |
| Reversible cerebral vasoconstriction syndrome | 0.2–7   | 1 (1–2)      | 1    |
| Moyamoya disease                              | 0.2–7   | 2 (1–3)      | 2    |
| Antiphospholipid antibody syndrome            | 0.4–13  | 2 (1–3)      | 2    |
| Cerebral venous thrombosis                    | 0.4–4   | 3 (1–4)      | 2    |
| Arterial dissection                           | 1–25    | 12 (7–14)    | 15   |
| Protein S deficiency                          | 0.1–3   | 0.4 (0.3–1)  | 1    |
| Hyperhomocysteinemia                          | 0.2–35  | 4 (0.4–16)   | 1    |
| Drugs                                         | 0.2–2   | 0.3 (0.3–1)  | 1    |
| Protein C deficiency                          | 0.1–1   | 0.4 (0.2–1)  | 0.3  |

Min: minimum, Max: maximum, IQR: interquartile range.

Data are expressed as percentage in all young adult patients with ischemic stroke. The percentages reported in previous studies are shown for comparison with those in the present study.
